# Supplementary material for: Enhancing the catalytic performance of cobalt oxide by doping on ceria in the high temperature water–gas shift reaction
Source: Royal Society of Chemistry journal article supplement (doi:10.1039/c5ra22704f), 2015-01-01
Supplement: c5ra22704f1.pdf [file c5ra22704f1.pdf]

## Electronic Supplementary Information (ESI)

### Enhancing catalytic performance of cobalt oxide by doping on ceria in the high temperature water–gas shift reaction

Ajay Jha,<sup>a</sup> Dae-Woon Jeong,<sup>a</sup> Yeol-Lim Lee,<sup>a</sup> In Wook Nah,<sup>b</sup> and Hyun-Seog Roh\*<sup>a</sup>

<sup>a</sup> Department of Environmental Engineering, Yonsei University, 1 Yonseidae-gil, Wonju, Gangwon 26493, South Korea. E-mail: [hsroh@yonsei.ac.kr](mailto:hsroh@yonsei.ac.kr); Fax: +82-33-760-2571.

<sup>b</sup> Center for Energy Convergence, Korea Institute of Science and Technology (KIST), 5 Hwarang-ro 14-Gil, Seongbuk-gu, Seoul 02792, South Korea.

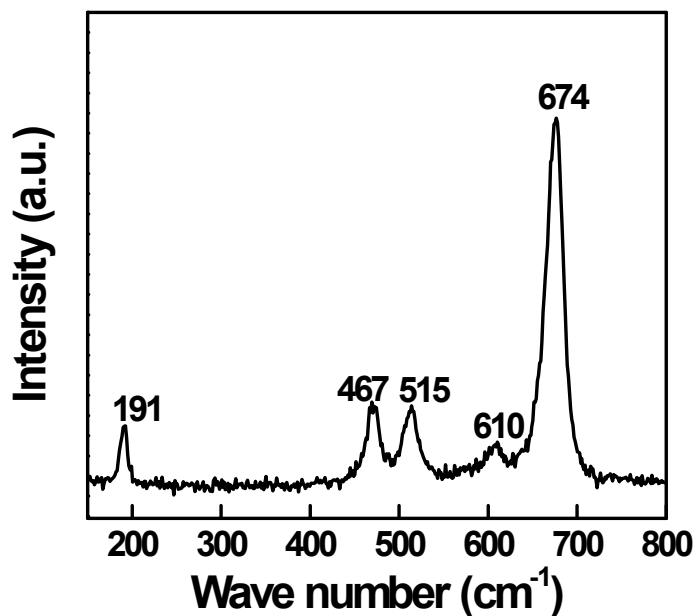

Fig. S1 Raman spectra of Bulk Co<sub>3</sub>O<sub>4</sub>.

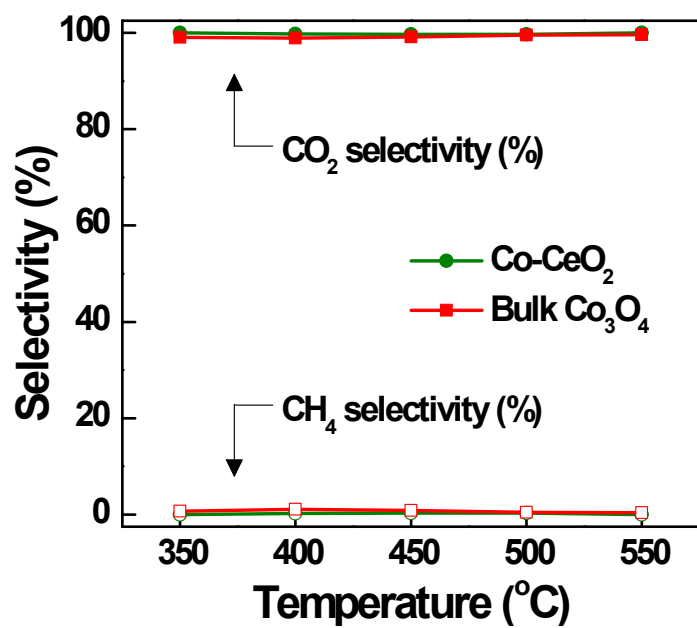

Fig. S2 Selectivity to CO<sub>2</sub> and CH<sub>4</sub> obtained over Co-CeO<sub>2</sub> and Bulk Co<sub>3</sub>O<sub>4</sub> catalyst.

**Table S1.** Surface area of catalysts before and after reaction

| <b>Catalyst</b>                | <b><math>S_{\text{BET}}</math> (<math>\text{m}^2\text{g}^{-1}</math>)</b> |             |
|--------------------------------|---------------------------------------------------------------------------|-------------|
|                                | <b>Fresh</b>                                                              | <b>Used</b> |
| Co–CeO <sub>2</sub>            | 122                                                                       | 61 (50%↓)   |
| Co <sub>3</sub> O <sub>4</sub> | 46                                                                        | 10 (78%↓)   |
| CeO <sub>2</sub>               | 150                                                                       | -           |
